# Supplementary material
Source: HighWire-hosted journal article supplement (http://ajnr-stage2.highwire.org/highwire/filestream/65698/field_highwire_adjunct_files/0/18-00960.pdf)
Supplement: 18-00960.pdf [file 18-00960.pdf]

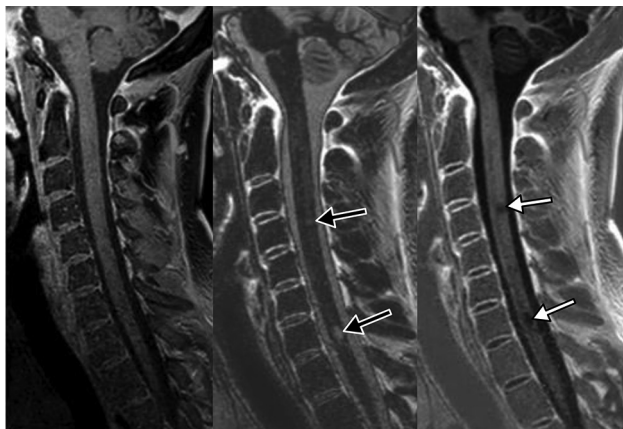

**ON-LINE FIG 1.** Presentation of the 3D-PSIR-derived images in the sagittal plane, with 2 magnitude images shown (left and middle) and 1 phase-corrected real image (right). Spinal cord lesions are hyperintense on the magnitude image (*black arrows*) and hypointense on the phase-corrected real image (*white arrows*).

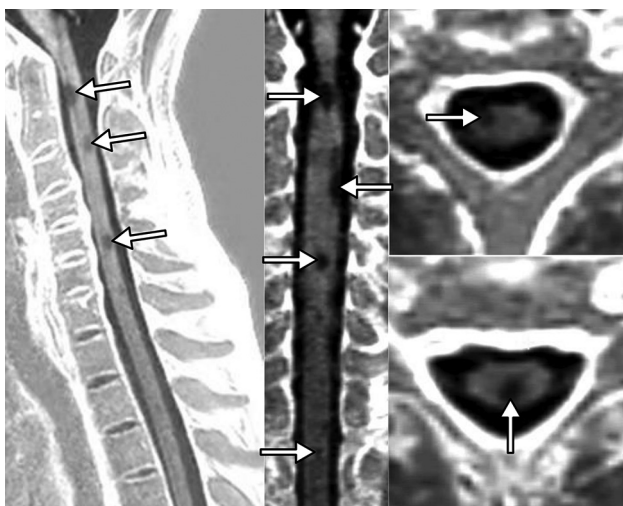

**ON-LINE FIG 2.** 3D-PSIR reformatted in the sagittal (left), coronal (middle), and axial (right) planes. Spinal cord lesions (*white arrows*) are nicely delineated in the 3 dimensions.
